# Supplementary material for: Evaluation of antenatal risk factors for postpartum depression: a secondary cohort analysis of the cluster-randomised GeliS trial
Source: Springer Nature journal article supplement (doi:10.1186/s12916-020-01679-7), 2020-07-24
Supplement: MOESM1 [file 12916_2020_1679_MOESM1_ESM.pdf › 12916_2020_1679_MOESM1_ESM.pdf]

**Supplementary Table 1: PPD incidence in intervention and control groups.**

|        | <b>Control<br/>n (%)</b> | <b>Intervention<br/>n (%)</b> | <b>Unadjusted OR<br/>(95% CI)</b> | <b><i>p</i></b> | <b>Adjusted OR<br/>(95% CI)*</b> | <b>Adjusted <i>p</i>*</b> |
|--------|--------------------------|-------------------------------|-----------------------------------|-----------------|----------------------------------|---------------------------|
| No PPD | 728/786 (92.6%)          | 717/797 (90.0%)               | Ref                               |                 | Ref                              |                           |
| PPD    | 58/786 (7.4%)            | 80/797 (10.0%)                | 1.36 (0.92-2.02)                  | 0.13            | 1.31 (0.89-1.92)                 | 0.17                      |

Depicted is the odds ratio of having PPD along with the 95% confidence interval from logistic regression analyses fit with generalised estimating equations.

\*Adjusted for maternal pre-pregnancy age, pre-pregnancy BMI, parity.

Abbreviations: BMI: body mass index OR: odds ratio; PPD: postpartum depression.
