# Supplementary material for: Evaluation of antenatal risk factors for postpartum depression: a secondary cohort analysis of the cluster-randomised GeliS trial
Source: Springer Nature journal article supplement (doi:10.1186/s12916-020-01679-7), 2020-07-24
Supplement: MOESM3 [file 18213512]

**Supplementary Table 3: Characteristics (n (%)) of GeliS study participants according to pre-pregnancy BMI categories (normal weight as reference category) (n = 1583).**

|                                                                  | Normal weight<br>n = 1047 (66.1%) | Overweight<br>n = 352 (22.2%) | Obesity<br>n = 184 (11.6%) | <i>p</i> * |
|------------------------------------------------------------------|-----------------------------------|-------------------------------|----------------------------|------------|
| <b>Maternal characteristics</b>                                  |                                   |                               |                            |            |
| Pre-pregnancy BMI, mean ± SD                                     | 21.8 ± 1.8                        | 26.9 ± 1.4                    | 33.7 ± 3.0                 | <.0001     |
| GWG (kg), mean ± SD                                              | 14.7 ± 4.5                        | 14.0 ± 5.7                    | 11.0 ± 6.7                 | <.0001     |
| Excessive GWG                                                    | 373 (35.6)                        | 234 (66.5)                    | 115 (62.5)                 | <.0001     |
| Parity                                                           |                                   |                               |                            |            |
| 0                                                                | 622 (59.4)                        | 194 (55.1)                    | 114 (62.0)                 |            |
| 1                                                                | 348 (33.2)                        | 131 (31.0)                    | 57 (31.1)                  | 0.56       |
| ≥ 2                                                              | 77 (7.4)                          | 27 (7.7)                      | 13 (7.1)                   |            |
| <b>Demographic factors</b>                                       |                                   |                               |                            |            |
| Age, mean ± SD                                                   | 30.3 ± 4.4                        | 30.4 ± 4.2                    | 30.6 ± 4.8                 | <.0001     |
| Educational level                                                |                                   |                               |                            |            |
| High School or others                                            | 571 (54.5)                        | 230 (65.3)                    | 129 (70.1)                 | <.0001     |
| University                                                       | 476 (45.5)                        | 122 (34.7)                    | 55 (29.9)                  |            |
| Married                                                          | 686 (65.5)                        | 247 (70.2)                    | 124 (67.4)                 | 0.27       |
| Living alone                                                     | 37 (3.6)                          | 8 (2.3)                       | 2 (1.1)                    | 0.13       |
| <b>Lifestyle and metabolic factors</b>                           |                                   |                               |                            |            |
| Alcohol consumption                                              | 315 (30.1)                        | 109 (31.0)                    | 57 (31.0)                  | 0.94       |
| Smoking                                                          | 51 (4.9)                          | 17 (4.8)                      | 12 (6.5)                   | 0.63       |
| Low level of physical activity <sup>°</sup>                      | 524 (50.1)                        | 182 (51.7)                    | 96 (52.2)                  | 0.79       |
| Gestational diabetes mellitus                                    | 70 (7.0)                          | 34 (9.9)                      | 51 (28.3)                  | <.0001     |
| <b>Psychological factors</b>                                     |                                   |                               |                            |            |
| Antenatal history of anxiety / depressive symptoms <sup>°°</sup> | 424 (66.1)                        | 154 (43.8)                    | 82 (44.6)                  | 0.40       |

\**p*-value for differences between pre-pregnancy obesity categories using the Kruskal-Wallis test for continuous variables and the  $\chi^2$  test for categorical variables.

<sup>°</sup> Assessed by the Pregnancy Physical Activity Questionnaire (PPAQ) before the end of the 12<sup>th</sup> week of gestation.

<sup>°°</sup> Assessed by the Patient Health Questionnaire for Depression and Anxiety (PHQ)-4 before the end of the 12<sup>th</sup> week of gestation. Abbreviations: BMI: body mass index; GWG: Gestational weight gain (as defined by the IOM).
