# Supplementary material for: Evaluation of antenatal risk factors for postpartum depression: a secondary cohort analysis of the cluster-randomised GeliS trial
Source: Springer Nature journal article supplement (doi:10.1186/s12916-020-01679-7), 2020-07-24
Supplement: MOESM4 [file 18213512]

**Supplementary Table 4: Characteristics (n (%)) of GeliS study participants according to excessive gestational weight gain (GWG) (excessive vs. non-excessive) (n = 1583).**

|                                                                  | Excessive GWG<br>n = 722 (45.6%) | Non-excessive GWG<br>n = 861 (54.4%) | p*            |
|------------------------------------------------------------------|----------------------------------|--------------------------------------|---------------|
| <b>Maternal characteristics</b>                                  |                                  |                                      |               |
| Pre-pregnancy BMI, mean ± SD                                     | 25.4 ± 4.5                       | 23.4 ± 4.1                           | <.0001        |
| Pre-pregnancy BMI categories                                     |                                  |                                      |               |
| BMI: 18.5–24.9 kg/m <sup>2</sup>                                 | 373 (51.7)                       | 674 (78.3)                           | <.0001        |
| BMI: 25.0–29.9 kg/m <sup>2</sup>                                 | 234 (32.4)                       | 118 (13.7)                           |               |
| BMI: 30.0–40.0 kg/m <sup>2</sup>                                 | 115 (15.9)                       | 69 (8.0)                             |               |
| Parity                                                           |                                  |                                      |               |
| 0                                                                | 469 (65.0)                       | 461 (53.5)                           | <.0001        |
| 1                                                                | 207 (28.7)                       | 329 (38.2)                           |               |
| ≥ 2                                                              | 46 (6.4)                         | 71 (8.3)                             |               |
| <b>Demographic factors</b>                                       |                                  |                                      |               |
| Age, mean ± SD                                                   | 29.9 ± 4.2                       | 30.8 ± 4.6                           | <.0001        |
| Educational level                                                |                                  |                                      |               |
| High School or others                                            | 465 (64.4)                       | 466 (54.1)                           | <b>0.0003</b> |
| University                                                       | 257 (35.6)                       | 395 (45.9)                           |               |
| Married                                                          | 483 (66.9)                       | 574 (66.7)                           | 0.93          |
| Living alone                                                     | 18 (2.5)                         | 29 (3.4)                             | 0.31          |
| <b>Lifestyle and metabolic factors</b>                           |                                  |                                      |               |
| Alcohol consumption                                              | 213 (29.5)                       | 268 (31.1)                           | 0.48          |
| Smoking                                                          | 42 (5.8)                         | 38 (4.4)                             | 0.20          |
| Low level of physical activity <sup>°</sup>                      | 373 (51.7)                       | 429 (49.8)                           | 0.47          |
| Gestational diabetes mellitus                                    | 54 (7.8)                         | 101 (12.2)                           | <b>0.01</b>   |
| <b>Psychological factors</b>                                     |                                  |                                      |               |
| Antenatal history of anxiety / depressive symptoms <sup>°°</sup> | 319 (44.2)                       | 341 (39.6)                           | 0.07          |

\*p-value for differences between excessive vs. non-excessive GWG using the Kruskal-Wallis test for continuous variables and the  $\chi^2$  test for categorical variables.

<sup>°</sup> Assessed by the Pregnancy Physical Activity Questionnaire (PPAQ) before the end of the 12<sup>th</sup> week of gestation.

<sup>°°</sup> Assessed by the Patient Health Questionnaire for Depression and Anxiety (PHQ)-4 before the end of the 12<sup>th</sup> week of gestation. Abbreviations: BMI: body mass index; GWG: Gestational weight gain; Excessive GWG as defined by the IOM.
