# Supplementary material for: Evaluation of antenatal risk factors for postpartum depression: a secondary cohort analysis of the cluster-randomised GeliS trial
Source: Springer Nature journal article supplement (doi:10.1186/s12916-020-01679-7), 2020-07-24
Supplement: MOESM5 [file 18213512]

**Supplementary table 5: Associations between GWG (inadequate, excessive vs. adequate) and PPD at 6–8 weeks postpartum (n = 1583).**

| <b>Covariate</b>                                                 | <b>Model 1</b>      | <b>Model 2</b>        |
|------------------------------------------------------------------|---------------------|-----------------------|
| <b>GWG</b>                                                       |                     |                       |
| Inadequate (n = 402)                                             | 0.07 (0.01 – 0.78)  | 0.09 (0.01 – 1.07)    |
| Excessive (n = 851)                                              | 1.32 (0.16 – 11.28) | 1.28 (0.14 – 11.30)   |
| Adequate (n = 632)                                               | Ref.                | Ref.                  |
| Pre-pregnancy BMI                                                | 1.03 (0.96 – 1.10)  | 1.03 (0.96 – 1.09)    |
| <b>GWG*Pre-pregnancy BMI</b>                                     |                     |                       |
| Inadequate vs. adequate                                          | 1.09 (1.00 – 1.20)  | 1.08 (0.98 – 1.19)    |
| Excessive vs. adequate                                           | 1.00 (0.91 – 1.09)  | 0.99 (0.91 – 1.09)    |
| Age                                                              | 0.97 (0.94 – 1.01)  | 1.01 (0.97 – 1.04)    |
| Group effect                                                     | 1.39 (0.93 – 2.10)  | 1.41 (0.94 – 2.12)    |
| Married                                                          |                     | 0.69 (0.53 – 0.91)**  |
| Lower educational level                                          |                     | 1.32 (0.98 – 1.76)    |
| Parity                                                           |                     |                       |
| 1                                                                |                     | 0.79 (0.57 – 1.11)    |
| ≥ 2                                                              |                     | 0.65 (0.34 – 1.23)    |
| High alcohol intake                                              |                     | 1.27 (0.88 – 1.84)    |
| Low level of physical activity <sup>°</sup>                      |                     | 0.94 (0.71 – 1.26)    |
| Smoking                                                          |                     | 1.49 (0.76 – 2.92)    |
| Gestational diabetes mellitus                                    |                     | 1.28 (0.88 – 1.87)    |
| Antenatal history of anxiety / depressive symptoms <sup>°°</sup> |                     | 3.40 (2.45 – 4.71)*** |

Depicted are odds ratios (OR) along with the 95% confidence intervals (CI) estimated by multivariable logistic regression models. \*  $p < 0.05$ , \*\*  $p < 0.01$ , \*\*\*  $p < .0001$ .

<sup>°</sup> Assessed by the Pregnancy Physical Activity Questionnaire (PPAQ) before the end of the 12<sup>th</sup> week of gestation.

<sup>°°</sup> Assessed by the Patient Health Questionnaire for Depression and Anxiety (PHQ)-4 before the end of the 12<sup>th</sup> week of gestation.

Abbreviations: BMI: body mass index; GWG: gestational weight gain; Excessive GWG as defined by the IOM.
